# Supplementary material for: Loss of Mtm1 causes cholestatic liver disease in a model of X-linked myotubular myopathy
Source: JCI journal article supplement (doi:10.1172/jci166275), 2023-07-25
Supplement: sd1 [file 1]

**Supplemental Data:****Supplemental Table 1. Chemicals used in Zebrafish BODIPY Screen**

| Chemical Name           | Concentration | Ordering Information  | Proportion rescued in Fig 8A |
|-------------------------|---------------|-----------------------|------------------------------|
| Trehalose               | 50mM          |                       | 0                            |
| Valproic acid (VPA)     | 250 $\mu$ M   | Sigma, P4543          | 0.250                        |
| Dyngo-4a                | 12.5 $\mu$ M  | Cedarlane, S7163      | 0.375                        |
| Dynasore                | 25 $\mu$ M    | Cedarlane, S8047      | 0.500                        |
| Wortmannin              | 0.1 $\mu$ M   | Cedarlane, S2758      | 0.250                        |
| Trametinib              | 100nM         | Cedarlane, 16292-25   | 0                            |
| AZD 2014                | 1 $\mu$ M     | Cedarlane, 17378-5    | 0                            |
| VPS34-IN1               | 1 $\mu$ M     | Cedarlane, 17392-5    | 0.125                        |
| Sodium 4-phenylbutyrate | 500 $\mu$ M   | Cedarlane, 11323-1    | 0.125                        |
| N-Acetyl-L-Cysteine     | 200 $\mu$ M   | Cedarlane, 20261-10   | 0.125                        |
| Obeticholic acid        | 5 $\mu$ M     | Cedarlane, 11031-5    | 0.2778                       |
| Cilofexor               | 1 $\mu$ M     | Cedarlane, 25747-1    | 0                            |
| Bezafibrate             | 100 $\mu$ M   | Cedarlane, 10009145-1 | 0                            |
| Ursodeoxycholic acid    | 100 $\mu$ M   | Cedarlane, 15121-250  | 0                            |
| Norursodeoxycholic acid | 10 $\mu$ M    | Cedarlane, 33925-1    | 0.125                        |
| Bafilomycin A1          | 0.002 $\mu$ M | Cedarlane, 11038-500  | 0                            |
| Rapamycin               | 1 $\mu$ M     | Cedarlane, 13346-5    | 0                            |
| PIK-III                 | 1 $\mu$ M     | Cedarlane, 17002-1    | 0                            |
| Azoramide               | 10 $\mu$ M    | Cedarlane, 18045-10   | 0.556                        |
| PD 0325901              | 100nM         | Cedarlane, 13034-5    | 0                            |
| TPT-260                 | 2.5 $\mu$ M   | Cedarlane, 16079      | 0                            |
| ES9-17                  | 10 $\mu$ M    | Chembridge, 7577817   | 0.250                        |
| Estradiol               | 10 $\mu$ M    | Sigma, E2758-1G       | 0                            |
| Rosiglitazone           | 10 $\mu$ M    | Cedarlane, 71740      | 0                            |
| Tamoxifen               | 2 $\mu$ M     | Sigma, H7904          | 0.114                        |

**Supplemental Table 2. Primers used in qPCR**

| Gene    | Primers                                                    |
|---------|------------------------------------------------------------|
| abcb11b | F- ATTTCCGCAGCAAAGAAGGC<br>R- GTTTTGTACCCCGGGAAAGC         |
| abcc2   | F- ACTGCGGTTGTTGTACCGAT<br>R- GCCGGATACGGTTTCTCCAA         |
| ppib    | F- CTCAGTTCTTCATCACCACAGTCC<br>R- AGAGGTTTATCTCTCCCGTCCGTC |

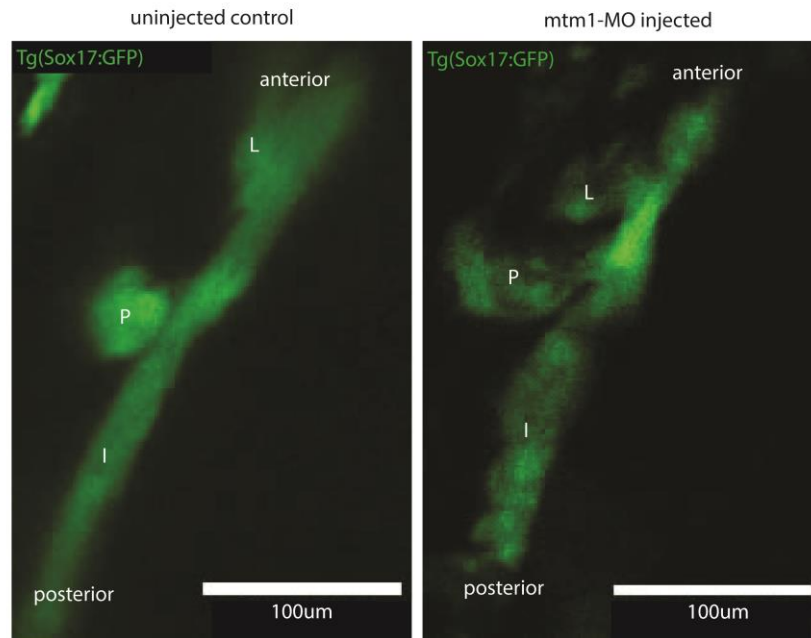

**Supplemental Figure 1: Mtm1 knockdown leads to normal early endoderm development.**

*Tg(sox17:GFP)* fish were injected at the 1-cell stage with a morpholino targeting *mtm1*, and were imaged at 2dpf to examine the gut progenitors. *mtm1* morphants develop proper liver (L), pancreatic (P), and intestinal (I) precursors at this timepoint similar to what is seen in un-injected controls.

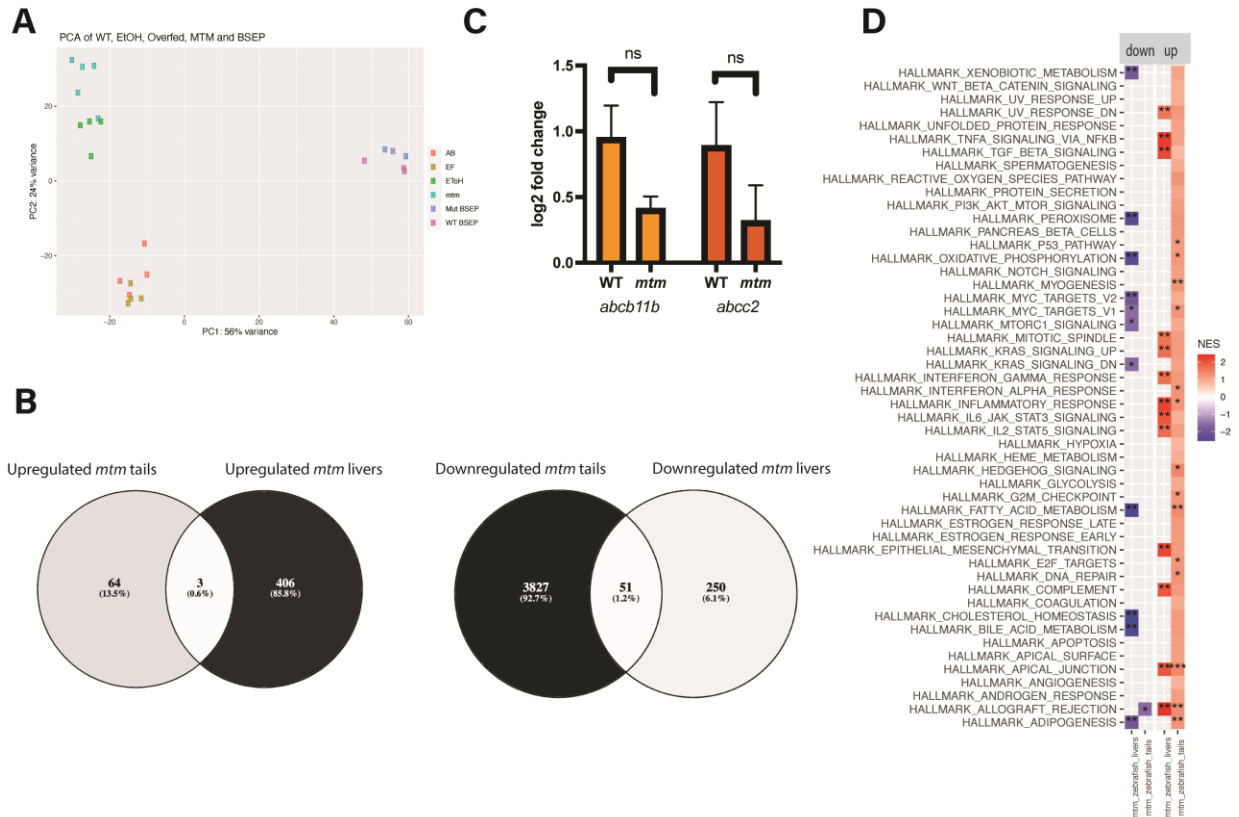

### Supplemental Figure 2: Comparative RNA sequencing analyses.

(A) Principal component analysis from liver RNAseq of different disease paradigms (see Figure 5) including *abcb11b* knockout (KO) samples. The *abcb11b* KO samples cluster very distinctly from the rest, which could be due to their time point of collection (6 dpf vs 7 dpf for all other groups), the data being collected in a separate RNAseq experiment, or to differences in genetic background (AB/TU for *abcb11b* KO, AB for all remaining lines) (B) Venn diagrams comparing the transcriptomes of *mtm* tails (representing muscle) and *mtm* livers. There is essentially no overlap between the two groups, suggesting the transcriptional changes with *mtm1* KO in each organ are unique. (C) qPCR data showing RNA levels of *abcb11b* and *abcc2*, normalized to *ppib*. 3 biological replicates and 2 technical replicates were performed. (D) Pathway analyses comparing the *mtm* livers and tails using the fgsea (v 1.10.1 R package) analytic tool.

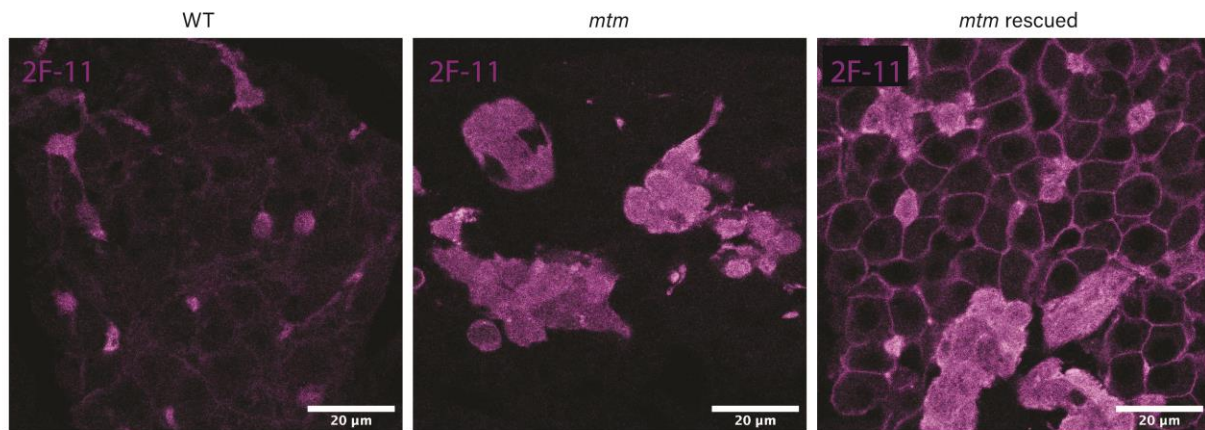

**Supplemental Figure 3: *mtm1-GFP* transgene fails to rescue the bile duct phenotype.** Sectioned 7 dpf zebrafish stained for 2F-11, a cholangiocyte marker. In *mtm* larvae with the *mtm1-GFP* transgene (far right), 2F-11 staining remains expanded, in addition to ectopic expression around the plasma membrane.

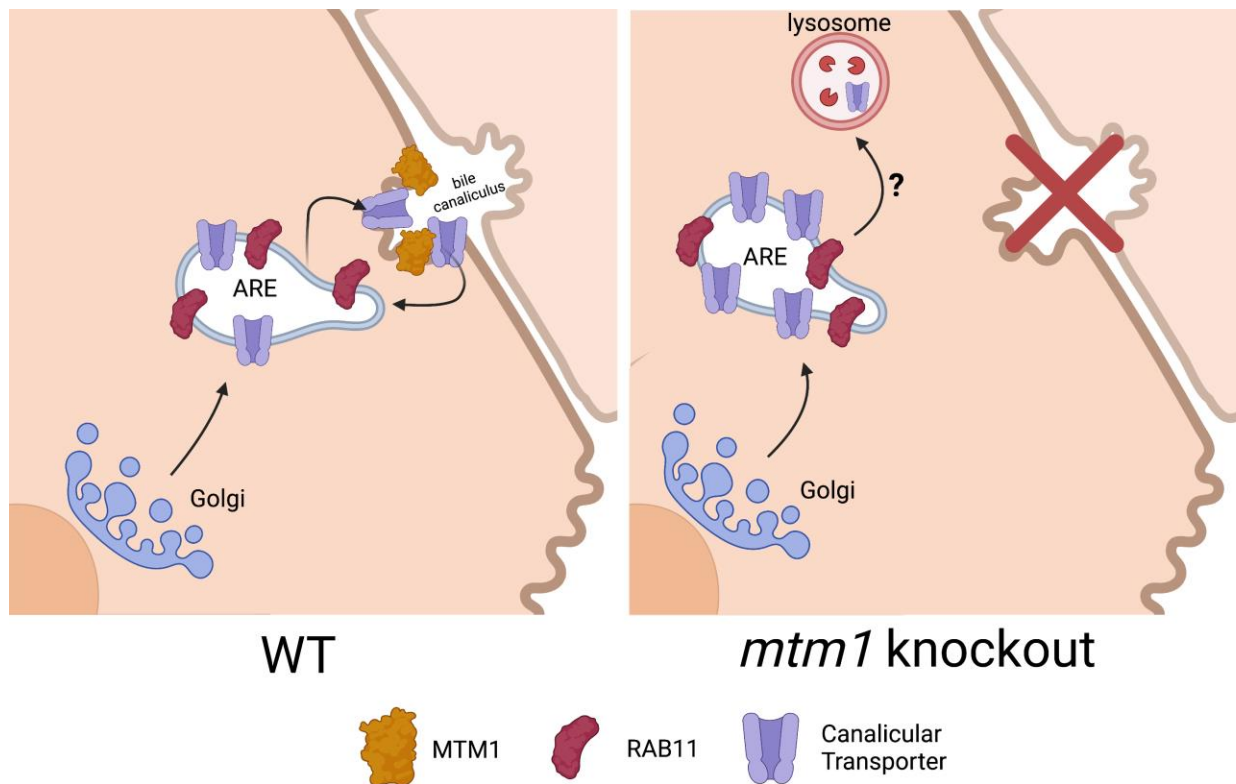

**Supplementary Figure 4: Schematic showing the hypothesized role of MTM1 in regulation of canalicular protein trafficking**

In wild type hepatocytes, canalicular transporters are trafficked from the Golgi apparatus into Rab11+ apical recycling endosomes (labeled ARE), from which they are trafficked to the canalicular membrane and recycled through the ARE when not needed and/or replaced with newly synthesized transporters. MTM1 appears to participate in and facilitate the regulation of this process. In the *mtm1* knockouts, the canaliculi are disturbed and there is a loss of polarity in the apical recycling endosomes. This may lead to degradation of canalicular transporters via the lysosomal compartment. This figure was generated using BioRender.
